# Supplementary material for: Accuracy of chimeric proteins in the serological diagnosis of chronic chagas disease – a Phase II study
Source: PLoS Negl Trop Dis. 2017 Mar 8;11(3):e0005433. doi: 10.1371/journal.pntd.0005433 (PMC5358787; doi:10.1371/journal.pntd.0005433)
Supplement: S4 Table — (XLSX) [file pntd.0005433.s004.xlsx]

## Sheet: S1 Fig
Samples	BAHIA					Samples	GOIÁS					Samples	MINAS GERAIS					Samples	PARANÁ					Samples	PERNAMBUCO					Samples	INTERN. COMMERCIAL PANEL
	IBMP-8.1	IBMP-8.2	IBMP-8.3	IBMP-8.4			IBMP-8.1	IBMP-8.2	IBMP-8.3	IBMP-8.4			IBMP-8.1	IBMP-8.2	IBMP-8.3	IBMP-8.4			IBMP-8.1	IBMP-8.2	IBMP-8.3	IBMP-8.4			IBMP-8.1	IBMP-8.2	IBMP-8.3	IBMP-8.4			IBMP-8.1	IBMP-8.2	IBMP-8.3	IBMP-8.4
Chagasic-01	3.25	2.56	2.37	2.65		Chagasic-208	6.71	3.24	3.33	3.1		Chagasic-399	0.51	1.06	1.16	1.59		Chagasic-172	4.02	4.41	4.82	4.36		Chagasic-74	2.94	1.9	2.6	2.25		Chagasic-66	2.5	1.11	1.18	2.65
Chagasic-02	4.34	1.13	1.4	4.29		Chagasic-209	3.41	1.66	1.27	1.47		Chagasic-400	0.41	1.47	1.26	1.25		Chagasic-173	4.2	1.42	2.65	3.41		Chagasic-75	5.63	2.74	3.53	4.3		Chagasic-67	2.02	0.77	2.46	2.25
Chagasic-03	4.15	2.52	3.04	3.39		Chagasic-210	3.25	1.58	2.45	1.85		Chagasic-401	3.91	4.04	1.9	4.29		Chagasic-174	4.89	1.82	4.55	5.13		Chagasic-76	5.48	7.42	4.17	4.43		Chagasic-68	2.18	2.64	2.63	2.95
Chagasic-04	2.88	2.77	3.21	2.99		Chagasic-211	6.98	1.43	3.36	2.97		Chagasic-402	4.68	4.44	2.42	4.94		Chagasic-175	3.47	3.25	3.8	4.49		Chagasic-77	4.27	4.35	3.96	3.84		Chagasic-69	1.75	0.87	1.28	1.77
Chagasic-05	5.7	2.23	3.52	5.97		Chagasic-212	5.63	1.26	2.77	2.41		Chagasic-403	1.94	5.54	2.42	4		Chagasic-176	2.17	1.54	2.2	1.64		Chagasic-78	5.01	5.42	2.72	3.31		Chagasic-70	1.29	0.65	1.21	1.94
Chagasic-06	3.59	4.13	3.59	5.22		Chagasic-213	6.69	2.62	3	2.38		Chagasic-404	1.69	1.82	1.56	1.83		Chagasic-177	4.64	2.32	5.34	4.69		Chagasic-79	2.23	1.37	2.47	1.93		Chagasic-71	0.86	0.66	1.25	2.27
Chagasic-07	4.95	2.99	4.11	2.74		Chagasic-214	4	1.15	2.21	1.61		Chagasic-405	3.08	3.36	0.99	2.71		Chagasic-178	3.84	3.59	3.64	3.81		Chagasic-80	2.24	2.16	0.66	1.78		Chagasic-72	0.91	0.65	1.02	1.02
Chagasic-08	2.79	3.32	3.23	2.74		Chagasic-215	5.51	1.43	2.44	2.45		Chagasic-406	4.81	3.79	1.75	3.65		Chagasic-179	4.5	3.04	4.15	4.7		Chagasic-83	4.07	4.99	2.61	3.3		Chagasic-73	3.09	1.48	1.04	3.07
Chagasic-09	4.24	1.14	3.93	5.53		Chagasic-216	5.02	4.78	2.61	3.03		Chagasic-407	6.08	3.94	2.36	3.56		Chagasic-180	4.48	3.88	4.46	4.47		Chagasic-86	4.21	3.76	2.12	2.89		Chagasic-81	4.32	2.1	2.55	3.9
Chagasic-10	9.19	3.23	3.24	6.27		Chagasic-217	6.38	4.57	2.74	3.33		Chagasic-408	2.38	6.1	2.66	4.06		Chagasic-181	4.69	3.82	2.94	4.63		Chagasic-89	5.14	6.67	4.32	4.37		Chagasic-82	3.84	1.18	1.79	3.74
Chagasic-11	2.07	2.27	1.63	0.98		Chagasic-218	4.14	5.07	2.81	2.62		Chagasic-409	2.77	1.64	0.38	2.44		Chagasic-182	2.04	1.66	3.31	2.13		Chagasic-92	2.32	3.95	2.09	2.39		Chagasic-84	6.25	3.2	3.83	5.56
Chagasic-12	4.33	1.41	2.51	3.25		Chagasic-219	2.25	1.07	0.64	1.04		Chagasic-410	3.27	1.18	1.17	2.1		Chagasic-183	1.53	1.79	1.03	1.15		Chagasic-94	5.32	5.25	3.43	4.02		Chagasic-85	4.27	2.05	1.48	3.64
Chagasic-13	8.61	4.44	3.59	5.24		Chagasic-220	2.5	1.53	1.99	1.33		Chagasic-411	2.44	2.24	1.63	3.92		Chagasic-184	0.36	1.24	1.4	1.02		Chagasic-97	5.36	6.04	2.77	4.75		Chagasic-87	3.13	3.12	1.23	3.32
Chagasic-14	4.72	2.6	1.74	4.92		Chagasic-221	7.95	2.78	2.63	3.25		Chagasic-412	2.59	2.21	2.02	3.93		Chagasic-185	4.2	4.22	3.78	3.35		Chagasic-100	3.58	5.13	5.73	3.53		Chagasic-88	4.66	3.98	3.55	4.17
Chagasic-15	2.25	2.2	3.13	2.13		Chagasic-222	5.62	4.79	2.82	3.12		Chagasic-413	0.85	1.98	1.68	2.62		Chagasic-186	3.18	1.7	3.77	2.3		Chagasic-101	2.06	1.65	4.35	3.21		Chagasic-90	2.76	2.23	1.87	3.16
Chagasic-16	3.32	1.17	1.89	3.45		Chagasic-223	6.03	2.02	2.34	2.76		Chagasic-414	2.77	1.44	2.06	1.65		Chagasic-187	3.73	2.71	4.34	3.91		Chagasic-102	2.43	1.76	2.29	2.62		Chagasic-91	2.75	1.56	1.2	2.77
Chagasic-17	3.08	1.28	1.06	3.19		Chagasic-224	6.82	4.58	2.36	3.07		Chagasic-415	1.74	2.23	2.58	2.07		Chagasic-188	3.21	2.36	3.92	2.97		Chagasic-103	4.45	4.42	4.54	4.1		Chagasic-93	5.32	3.58	3.27	4.6
Chagasic-18	1.79	1.01	3.34	2.23		Chagasic-225	4.46	1.93	2.55	2.41		Chagasic-416	3.65	0.91	0.94	1		Chagasic-189	1.73	1.35	1.3	1.34		Chagasic-104	4.56	7.5	4.89	4.95		Chagasic-95	1.65	1.27	1.95	2.86
Chagasic-19	3.18	1.65	3.82	2.88		Chagasic-226	6.07	4.16	2.77	3.16		Chagasic-417	4.6	2.2	0.75	3.48		Chagasic-190	1.22	1.37	2.75	1.19		Chagasic-106	6.08	7.15	9.52	4.99		Chagasic-96	3.22	1.75	1.22	2.57
Chagasic-20	1.02	1.29	2.48	1.69		Chagasic-227	0.96	3.4	2.55	2.24		Chagasic-418	2.51	2.86	1.69	4.14		Chagasic-191	1.72	1.65	3	1.49		Chagasic-107	4.89	3.78	7.23	4.08		Chagasic-98	3.64	1.52	1.99	3.37
Chagasic-21	2.35	1.18	1.46	1.98		Chagasic-228	7.21	3.46	3.41	3.02		Chagasic-419	1.68	0.86	2.11	2.55		Chagasic-192	3.45	2.54	3.97	2.7		Chagasic-108	0.98	0.89	3.37	1.05		Chagasic-99	1.58	1.28	1.76	1.74
Chagasic-22	3.29	1.19	3.46	2.92		Chagasic-229	8.3	4.61	3.37	3.41		Chagasic-420	4.76	2.98	1.79	2.14		Chagasic-193	3.91	3.34	3.85	3.6		Chagasic-110	3.25	4.57	6.78	3.87		Chagasic-105	6.4	1.33	3.86	5.67
Chagasic-23	6.46	3.49	3.09	5.24		Chagasic-230	1.16	3.99	1.53	1.44		Chagasic-421	5.46	5.7	2.42	5.43		Chagasic-194	3.96	4.08	4.48	4.47		Chagasic-111	1.46	1.29	1.3	1.66		Chagasic-109	3.42	2.25	2.36	3.44
Chagasic-24	3.16	0.79	2.14	1.92		Chagasic-231	6.09	2.11	2.32	2.46		Chagasic-422	4.02	5.94	2.37	5.17		Chagasic-195	2.03	1.39	2.86	3.37		Chagasic-112	4.65	4.59	4.01	4.97		Chagasic-128	7.91	2.07	2.1	5.65
Chagasic-25	2.82	0.68	1.82	2.49		Chagasic-232	5.18	3.39	2.04	2.64		Chagasic-423	5.83	2.31	1.52	3.63		Chagasic-196	2.17	2.54	2.64	3.18		Chagasic-113	2.21	1.58	0.77	1.86		Chagasic-138	5.67	1.23	3.22	4.79
Chagasic-26	4.75	1.69	2.65	4.83		Chagasic-233	2.79	2.67	2.25	1.08		Chagasic-424	1.47	5.85	5.69	4.48		Chagasic-197	3.79	3.01	4.49	3.07		Chagasic-114	2.66	2.63	7.9	2.85		Chagasic-148	4.13	3.11	1.72	3.47
Chagasic-27	4.45	3.13	3.26	2.99		Chagasic-234	3.67	1.83	2.54	1.44		Chagasic-425	1.24	1.62	3.96	2.54		Chagasic-198	1.51	1.25	1.11	1.42		Chagasic-115	2.04	2.26	3.5	2.12		Chagasic-149	4.45	3.27	3.15	4.5
Chagasic-28	2.02	1.05	1.2	3.02		Chagasic-235	3.41	1.34	1.33	1.03		Chagasic-426	2.53	1.84	4.4	1.19		Chagasic-199	2.15	1.63	2.34	1.82		Chagasic-116	4.04	6.42	3.64	6.89		Chagasic-160	5.97	3.17	3.81	5.27
Chagasic-29	4.14	0.83	2.2	3.35		Chagasic-236	4.86	2.32	2.46	2.62		Chagasic-427	1.83	1.25	1.04	3.28		Chagasic-200	4.16	3.04	4.61	4.45		Chagasic-117	5.27	6.12	3.28	6.17		Chagasic-161	2.23	2.97	2.64	3.55
Chagasic-30	5	1.4	1.45	4.25		Chagasic-237	2.18	1.78	1.2	1.1		Chagasic-428	2.04	1.6	4.1	2.67		Chagasic-201	1.21	1.26	5.09	1.33		Chagasic-118	1.28	1.01	0.51	2.46		Chagasic-169	2.07	1.44	1.52	2.89
Chagasic-31	1.8	1.4	1.69	2.14		Chagasic-238	6.41	5.62	3.17	2.74		Chagasic-429	1.55	1.44	2.32	2.01		Chagasic-202	2.29	0.98	2.37	2.49		Chagasic-119	1.34	2.5	2.52	3.12		Chagasic-170	3.21	1.26	1.58	2.42
Chagasic-32	2.1	1.37	1.34	1.61		Chagasic-239	8.34	3.17	3.6	3.42		Chagasic-430	3.48	1.73	1.17	1.9		Chagasic-203	1.17	1.31	2.09	1.31		Chagasic-120	1.18	1.65	1.08	2.7		Chagasic-171	7.58	4.16	2.66	5.33
Chagasic-33	5.17	1.71	1.22	5.02		Chagasic-240	2.93	1.68	1.14	1.08		Chagasic-431	2.8	1.96	1.04	1.95		Chagasic-204	1.1	1.13	1.87	1.53		Chagasic-121	2.83	3.41	3.26	6
Chagasic-34	4.15	1.36	3.91	3.59		Chagasic-241	4.7	1.43	3.07	2.39		Chagasic-432	2.05	3.11	3.82	2.76		Chagasic-205	4	3.57	4.2	3.1		Chagasic-122	2.62	4.41	3.13	5.85
Chagasic-35	2.57	2.43	2.12	3.85		Chagasic-242	6.11	2.81	2.83	3.01		Chagasic-433	3.59	1.77	1.18	1.77		Chagasic-206	2.72	1	2.4	3.2		Chagasic-123	2.18	1.2	1.46	2.74
Chagasic-36	3.97	1.83	2.41	3.6		Chagasic-243	7.86	5.65	2.83	3.29		Chagasic-434	2.64	0.93	5.42	3.58		Chagasic-207	1.65	1.01	2.55	2.34		Chagasic-124	3.48	4.43	3.87	4.48
Chagasic-37	5.15	2.36	2.77	4.84		Chagasic-244	4.13	2.48	2.58	2.2		Chagasic-435	5.18	1.59	2.22	1.95								Chagasic-125	1.3	0.45	1.92	1.66
Chagasic-38	3.73	1.39	3.4	4.64		Chagasic-245	4.47	2.64	2.97	2.8		Chagasic-436	1.48	6.43	7.05	5.14								Chagasic-126	2.54	1.75	2.6	3.29
Chagasic-39	5.31	2.2	3.45	4.44		Chagasic-246	4.07	1.23	1.2	1.44		Chagasic-437	2.96	1.67	1.28	2.68								Chagasic-127	2.89	3.97	3.49	4.69
Chagasic-40	3.54	1.59	2.68	2.99		Chagasic-247	3.9	1.4	2.76	2.4		Chagasic-438	2.95	2.42	1.72	2.79								Chagasic-129	3.58	6.32	3.63	3.21
Chagasic-41	0.95	1.31	2.7	2.44		Chagasic-248	1.21	1.56	0.78	1		Chagasic-439	4.64	6.49	2.85	3.74								Chagasic-130	3.54	3.07	4.22	2.23
Chagasic-42	4.9	1.87	2.91	3.68		Chagasic-249	5.11	1.47	2.52	2.95		Chagasic-440	5.03	5.92	2.37	4.87								Chagasic-131	3.98	4.68	4.34	3.47
Chagasic-43	5.61	1.79	3.57	4.85		Chagasic-250	5.99	2.61	2.85	2.25		Chagasic-441	4.56	2.6	2.33	2.75								Chagasic-132	2.19	1.79	2.55	2.2
Chagasic-44	3.6	2.04	2.16	3.82		Chagasic-251	3.48	2.19	1.3	1.17		Chagasic-442	2.13	2.03	1.25	1.64								Chagasic-133	1.14	1.19	1.15	1.29
Chagasic-45	1.41	1.06	1.32	1.38		Chagasic-252	3.63	4.31	2.57	3.46		Chagasic-443	3.79	2.23	2.31	2.76								Chagasic-134	4.09	2.33	2.17	2.96
Chagasic-46	1.43	0.9	1.29	1.89		Chagasic-253	3.01	2.08	2.56	3.17		Chagasic-444	5.93	6.97	2.76	4.9								Chagasic-135	1.59	1.05	1.78	1.57
Chagasic-47	1.46	2.71	1.87	2.51		Chagasic-254	7.79	4.9	1.65	5.15		Chagasic-445	4.51	1.44	1.34	1.98								Chagasic-136	3.9	1.92	3.88	2.2
Chagasic-48	2.34	3.54	2.21	2.88		Chagasic-255	6.37	7.23	2.96	5.38		Chagasic-446	1.77	1.22	1.7	2.08								Chagasic-137	4.38	3.76	4.14	3.52
Chagasic-49	4.37	2.89	2.44	2.39		Chagasic-256	6.29	2.36	2.75	4.97		Chagasic-447	2.81	2.46	2.15	2.6								Chagasic-139	2	2.35	5.05	2.51
Chagasic-50	4.84	4.62	3.07	2.72		Chagasic-257	4.57	3.14	2.7	4.81		Chagasic-448	4.82	3.79	2.8	3.68								Chagasic-140	4.44	3.96	5.42	3.01
Chagasic-51	5.65	1.08	1.55	1.27		Chagasic-258	1.47	0.62	1.17	1.79		Chagasic-449	1.8	1.18	1.05	1.37								Chagasic-141	6.73	6.02	5.62	3.62
Chagasic-52	5.77	1.96	1.47	2.55		Chagasic-259	3.7	3.39	2.81	4.42		Chagasic-450	2.37	2.22	2.03	2.6								Chagasic-142	4.49	5.97	2.14	3.42
Chagasic-53	4.28	4.52	3.63	4.39		Chagasic-260	4.96	2.69	2.52	4.38		Chagasic-451	2.15	4.93	2.6	3.23								Chagasic-143	2.21	1.89	1.38	2.3
Chagasic-54	5.95	4.85	4.8	5.11		Chagasic-261	5.19	4.93	3.02	2.56		Chagasic-452	6.5	6.68	2.88	4.98								Chagasic-144	2.67	3.06	2.48	2.69
Chagasic-55	1.58	1.24	1.93	1.03		Chagasic-262	5.43	4.39	3	2.94		Chagasic-453	5.6	6.14	2.84	3.4								Chagasic-145	2.72	4.56	2.3	2.95
Chagasic-56	6.55	3.31	4.52	3.15		Chagasic-263	6.41	4.37	2.52	3		Chagasic-454	4.99	3.18	1.72	3.14								Chagasic-146	1.08	1.03	1.79	1.24
Chagasic-57	3.97	1.3	2.15	3.17		Chagasic-264	7.86	4.97	3.02	3.2		Chagasic-455	3.14	2.11	3.1	3.23								Chagasic-147	1.24	2	1.22	1.78
Chagasic-58	2.91	2.17	2.08	3.52		Chagasic-265	0.79	1.99	2.05	1.2		Chagasic-456	4.15	2.67	2.94	3.85								Chagasic-150	2.39	3.25	1.8	2.89
Chagasic-59	6.89	3.14	3.76	4.9		Chagasic-266	6.74	1.43	2.64	1.43														Chagasic-151	3.36	4.52	3.48	3.84
Chagasic-60	5.7	3.17	4.32	2.77		Chagasic-267	5.22	3.15	3.13	2.57														Chagasic-152	3.37	3.42	3.06	3.32
Chagasic-61	10.31	4.6	4.91	5.6		Chagasic-268	5.23	4.49	2.32	2.09														Chagasic-153	3.26	2.69	2.45	3.53
Chagasic-62	4.26	4.08	1.87	4.14		Chagasic-269	7.91	5.25	3.56	3.65														Chagasic-154	1.91	1.06	1.84	1.65
Chagasic-63	5.5	2.13	2.98	2.24		Chagasic-270	3.3	1.28	1.68	1.84														Chagasic-155	3.07	2.36	3.34	3.13
Chagasic-64	1.86	4.1	3.17	3.6		Chagasic-271	4.94	3.75	2.53	1.43														Chagasic-156	3.02	3.07	3.37	3.67
Chagasic-65	3.28	1.53	1.29	2.86		Chagasic-272	4.32	1.79	2.75	2.56														Chagasic-157	4.06	2.35	3.1	3.01
						Chagasic-273	4.78	1.7	2.63	2.32														Chagasic-158	2.64	0.84	1.75	1.31
						Chagasic-274	2.9	4.48	2.98	2.69														Chagasic-159	5.34	3.73	3.77	4.45
						Chagasic-275	5.66	1.76	2.32	2.24														Chagasic-162	1.55	1.7	3.21	1.99
						Chagasic-276	3.39	2.92	1.94	2.12														Chagasic-163	4.44	2.15	1.4	3.89
						Chagasic-398	1.14	1.14	2.09	1.37														Chagasic-164	4.23	1.84	2.73	4.04
																								Chagasic-165	1.77	3.4	1.88	3.47
																								Chagasic-166	2.21	1.28	1.48	2.26
																								Chagasic-167	2.42	1.31	1.63	2.67
																								Chagasic-168	3.73	4.64	3.06	4.35
																								Chagasic-277	3.38	3.47	3.65	2.83
																								Chagasic-278	1.53	0.87	2.03	1.28
																								Chagasic-279	3.37	2.31	3.09	2.49
																								Chagasic-280	4.59	1.86	3.59	3.23
																								Chagasic-281	3.92	3.13	5.16	3.35
																								Chagasic-282	2.57	2.13	3.88	0.84
																								Chagasic-283	3.58	3.08	3.8	3.36
																								Chagasic-284	2.66	2.92	3.5	2.75
																								Chagasic-285	1.4	2.21	3.64	2.02
																								Chagasic-286	1.29	1.38	4.13	1.89
																								Chagasic-287	4.05	3.39	4.73	3.21
																								Chagasic-288	2.35	1.53	2.96	2.28
																								Chagasic-289	1.52	2	3.66	1.61
																								Chagasic-290	3.75	2.1	4.21	3.18
																								Chagasic-291	2.36	1.69	2.95	2.33
																								Chagasic-292	2.5	1.56	4.16	2.74
																								Chagasic-293	3.03	3.06	4.51	3.18
																								Chagasic-294	2.26	1.38	4.09	2.14
																								Chagasic-295	1.84	2.13	3.78	2.24
																								Chagasic-296	4.76	4.26	3.45	3.29
																								Chagasic-297	1.67	1.41	3.4	1.61
																								Chagasic-298	5.58	2.64	4.13	3.46
																								Chagasic-299	2	1.96	2.57	2.49
																								Chagasic-300	2.06	1.31	3.56	2.42
																								Chagasic-301	5.15	2.32	4.57	3.45
																								Chagasic-302	1.47	2.65	3.95	2.09
																								Chagasic-303	1.38	1.57	2.02	2.11
																								Chagasic-304	1.77	1.29	4.24	2.8
																								Chagasic-305	2.16	3.24	3.24	3.08
																								Chagasic-306	3.34	1.26	3.69	2.68
																								Chagasic-307	2.77	1.54	2.15	2.46
																								Chagasic-308	3.59	2.6	4.34	3.18
																								Chagasic-309	4.56	2.42	4.09	3.42
																								Chagasic-310	3.97	3.92	3.91	3.5
																								Chagasic-311	3.85	2.92	4.2	3.21
																								Chagasic-312	4.53	2.78	2.52	3.33
																								Chagasic-313	4.52	3.37	4.01	3.54
																								Chagasic-314	3.8	4.15	4.54	3.62
																								Chagasic-315	1.61	1.51	1.45	1.25
																								Chagasic-316	2.86	1.44	1.8	1.66
																								Chagasic-317	1.55	1.29	2.02	1.48
																								Chagasic-318	1.64	1.42	2.6	1.41
																								Chagasic-319	2.92	1.52	2.91	2.35
																								Chagasic-320	1.45	2.48	1.6	2.08
																								Chagasic-321	4.06	2.53	3.74	3.09
																								Chagasic-322	2.15	1.19	3.66	1.59
																								Chagasic-323	1.24	1.23	3.08	2.67
																								Chagasic-324	1.98	1.39	3.45	2.34
																								Chagasic-325	4.08	1.53	3.54	3.37
																								Chagasic-326	3.22	2.34	4.41	2.91
																								Chagasic-327	2.47	1.68	3.17	2.68
																								Chagasic-328	2.81	2.29	4.02	3.02
																								Chagasic-329	1.36	2.85	4.13	2.53
																								Chagasic-330	1.41	1.9	3.88	3.02
																								Chagasic-331	2.58	0.91	3.14	1.55
																								Chagasic-332	1.97	1.64	2.83	1.69
																								Chagasic-333	4.74	2.23	4.1	3.37
																								Chagasic-334	1.89	1.61	3.83	2.58
																								Chagasic-335	2.72	3.63	3.93	3.62
																								Chagasic-336	3.29	2.49	4.13	2.95
																								Chagasic-337	2.87	1.75	3.27	2.58
																								Chagasic-338	2.03	2.14	2.2	2.16
																								Chagasic-339	2.64	1.04	2.7	2.37
																								Chagasic-340	2.09	1.29	2.64	1.67
																								Chagasic-341	3.96	3.17	4.19	3.39
																								Chagasic-342	2.73	1.98	4.06	3.23
																								Chagasic-343	3.17	1.91	3.87	3.3
																								Chagasic-344	2.1	1.33	2.23	2.31
																								Chagasic-345	1.53	1.33	3.58	2.57
																								Chagasic-346	3.49	1.75	3.38	2.85
																								Chagasic-347	2.29	1.89	3.13	2.63
																								Chagasic-348	3.64	1.39	2.89	3.21
																								Chagasic-349	2.58	2.61	2.91	2.6
																								Chagasic-350	1.24	1.57	2.44	1.77
																								Chagasic-351	1.91	1.4	4.39	2.94
																								Chagasic-352	1.37	1.05	2.26	1.72
																								Chagasic-353	4.47	1.2	3.76	3.16
																								Chagasic-354	2.01	2.68	3.97	2.58
																								Chagasic-355	1.63	2.61	4.04	2.99
																								Chagasic-356	1.4	1.75	3.63	2.76
																								Chagasic-357	1.42	2.09	1.38	2.08
																								Chagasic-358	1.79	1.51	3.24	2.39
																								Chagasic-359	1.44	1.62	3.5	1.61
																								Chagasic-360	2.17	1.51	3.51	2.75
																								Chagasic-361	1.25	2.35	3.43	1.67
																								Chagasic-362	2.57	2	3.38	2.78
																								Chagasic-363	1.87	1.92	3.54	2.54
																								Chagasic-364	3.94	2.84	3.36	3.09
																								Chagasic-365	2.97	2.67	3.98	2.59
																								Chagasic-366	2.94	2.18	2.13	2.15
																								Chagasic-367	1.55	1.74	4.12	2.19
																								Chagasic-368	1.6	1.64	2.98	2.06
																								Chagasic-369	1.09	1.84	3.12	2.49
																								Chagasic-370	1.33	1.97	3.77	2.87
																								Chagasic-371	3.55	3.55	3.22	3.19
																								Chagasic-372	1.32	2.57	3.16	2.33
																								Chagasic-373	1.55	1.8	2.11	1.92
																								Chagasic-374	4.03	4.13	4.2	3.66
																								Chagasic-375	3.16	1.41	1.44	2.61
																								Chagasic-376	3.62	2.86	3.59	2.98
																								Chagasic-377	1.41	1.88	1.18	1.55
																								Chagasic-378	1.39	1.51	2.44	2.05
																								Chagasic-379	2.2	1.68	3.66	3.17
																								Chagasic-380	3.7	4	4.43	2.74
																								Chagasic-381	2.92	1.7	3.25	2.4
																								Chagasic-382	4.39	3.83	3.61	3.12
																								Chagasic-383	1.71	3.02	1.72	2.11
																								Chagasic-384	2.72	1.52	2.09	2.58
																								Chagasic-385	3.39	1.41	2.85	2.41
																								Chagasic-386	3.51	2.46	4.33	2.84
																								Chagasic-387	4.01	1.89	3.75	3.02
																								Chagasic-388	2.32	1.33	1.32	1.83
																								Chagasic-389	3.26	2.52	3.3	2.77
																								Chagasic-390	3.87	2.49	4.23	3.05
																								Chagasic-391	3.08	2.62	4.05	2.64
																								Chagasic-392	5.14	3.81	3.89	3.28
																								Chagasic-393	2.64	2.99	3.43	2.65
																								Chagasic-394	4.34	1.24	0.4	0.48
																								Chagasic-395	1.24	1.23	3.72	1.86
																								Chagasic-396	0.92	4.19	1.63	3.2
																								Chagasic-397	1.5	3.02	1.19	1.79
																								Chagasic-457	2.09	3.94	3.39	4.07
																								Chagasic-458	2.33	1.39	2.26	1.94
																								Chagasic-459	2.3	1.22	4.09	3.07
																								Chagasic-460	1.07	2.09	3.43	3.47
																								Chagasic-461	1.53	1.37	2.92	3.12
																								Chagasic-462	2.79	1.18	3.83	2.48
																								Chagasic-463	2.47	1.41	3.08	2.32
																								Chagasic-464	2.28	2.33	4.42	4.35
																								Chagasic-465	0.88	1.35	2.34	2.39
																								Chagasic-466	1.26	1.17	0.92	1.54
																								Chagasic-467	0.85	1.24	2.05	1.75
																								Chagasic-468	2.09	1.55	3.71	3.03
																								Chagasic-469	1.77	1.65	3.59	3.16
																								Chagasic-470	1.93	3.28	3.83	3.68
																								Chagasic-471	1.16	1.21	0.92	2.63
																								Chagasic-472	3.52	2.51	3.45	3.95
																								Chagasic-473	1.12	0.86	2.58	2.47
																								Chagasic-474	1.05	1.31	2.13	2.58
																								Chagasic-475	1.06	1.29	2.8	1.69
																								Chagasic-476	1.25	0.8	2.69	1.49
																								Chagasic-477	1.71	1.19	2.22	2.35
																								Chagasic-478	3.24	2.86	3.62	3.88
																								Chagasic-479	1.92	1.64	4.27	3.88
																								Chagasic-480	2.15	2.87	3.61	3.71
																								Chagasic-481	2.86	4.1	3.73	3.94
																								Chagasic-482	3.59	0.65	3.61	3.9
																								Chagasic-483	1.8	2.31	1.51	2.66
																								Chagasic-484	1.25	1.33	2.46	2.01
																								Chagasic-485	3.16	1.08	2.63	3.02
																								Chagasic-486	3.09	1.11	2.82	3.31
																								Chagasic-487	1.93	1.59	1.99	1.6
																								Chagasic-488	1.85	0.81	2.08	1.7
																								Chagasic-489	3.26	2.01	2.38	3.87
																								Chagasic-490	2.95	3.44	4.42	3.81
																								Chagasic-491	2.64	3.05	3	3.47
																								Chagasic-492	2.08	3.05	2.48	2.99
																								Chagasic-493	0.93	1.74	3.18	2.36
																								Chagasic-494	1.52	0.92	2.21	2.18
																								Chagasic-495	0.75	0.68	1.73	1.96
																								Chagasic-496	1.2	0.81	2.56	1.15
																								Chagasic-497	2.94	1.63	3.82	2.64
																								Chagasic-498	2.84	2.82	3.9	3.37
																								Chagasic-499	1.92	2.47	3.64	3.18
																								Chagasic-500	2.48	0.95	1.61	2.52
																								Chagasic-501	1.39	1.44	1.05	1.22
																								Chagasic-502	0.74	1.02	3.73	1.79
																								Chagasic-503	2.07	2.18	2.73	3.36
																								Chagasic-504	2.64	1.67	3.47	3.76
																								Chagasic-505	2.27	2.11	3.97	3.85
																								Chagasic-506	1	0.89	1.26	1.74
																								Chagasic-507	2.88	1.53	3.48	2.87
																								Chagasic-508	1.15	1.38	2.95	1.66
																								Chagasic-509	1.81	1.71	3.05	2.28
																								Chagasic-510	2.84	1.7	4.18	3
																								Chagasic-511	2.69	2.42	2.99	2.65
																								Chagasic-512	2.75	2.16	3.73	2.97
																								Chagasic-513	0.98	1.44	2.25	1.39
																								Chagasic-514	1.84	1.47	1.33	1.78
																								Chagasic-515	1.36	1.58	3.71	3.27
																								Chagasic-516	2.45	2.01	3.82	2.88
																								Chagasic-517	2.15	1.28	3.69	2.9
																								Chagasic-518	3.24	1.23	3.91	2.92
																								Chagasic-519	4.07	1.44	3.86	3.2
																								Chagasic-520	1.34	1.25	3.59	3.37
																								Chagasic-521	2.4	3.5	4	3.94
																								Chagasic-522	4.02	4.22	3.96	4.3
																								Chagasic-523	3.06	1.23	2.95	3.28
																								Chagasic-524	0.81	3.04	3.16	3.52
																								Chagasic-525	1.08	0.79	1.54	1.98
																								Chagasic-526	2.91	3.14	4.17	3.83
																								Chagasic-527	2.51	1.93	3.52	3.4
																								Chagasic-528	1.19	1.33	1.29	1.93
																								Chagasic-529	0.78	0.88	1.56	1.72
																								Chagasic-530	1.69	0.87	1.8	2.42
																								Chagasic-531	2.12	2.02	4.26	4.06
																								Chagasic-532	1.26	1.22	1.86	2.55
																								Chagasic-533	1.97	0.92	2.6	2.24
																								Chagasic-534	1.89	1.12	3.64	3.37
																								Chagasic-535	1.6	2.37	3.22	3.02
																								Chagasic-536	0.92	1.26	3.69	3.35
																								Chagasic-537	4.09	3.12	3.92	3.77
																								Chagasic-538	3.11	3.55	8.32	2.98
																								Chagasic-539	2.6	4.79	5.31	3.74
																								Chagasic-540	2.49	2.94	6.07	3.14
																								Chagasic-541	2.17	2.62	2.7	2.43
																								Chagasic-542	4.59	3.93	2.16	3.15
																								Chagasic-543	7.11	3.05	5.52	3.58
																								Chagasic-544	2.8	1.4	2.43	2.02
																								Chagasic-545	1.8	2.39	4.02	2.33
																								Chagasic-546	3.92	1.56	5.29	2.03
																								Chagasic-547	3.39	1.9	1.54	2.51
																								Chagasic-548	3.56	2.92	5.92	3.05
																								Chagasic-549	3.98	2.5	1.79	2.88
																								Chagasic-550	7.11	3.66	4.67	3.6
																								Chagasic-551	1.49	1.31	1.1	1.38
																								Chagasic-552	1.19	2.39	2.86	1.88
																								Chagasic-553	4.45	4.07	2.08	3
																								Chagasic-554	2.93	4.14	2.19	2.78
																								Chagasic-555	3.24	1.61	5.7	2.33
																								Chagasic-556	3.09	2.12	2.88	2.62
																								Chagasic-557	1.44	1.22	1.18	1.29
																								Chagasic-558	1.08	1.64	2.2	2.16
																								Chagasic-559	2.34	3.47	3.46	2.51
																								Chagasic-560	1.2	1.42	2.03	1.5
																								Chagasic-561	4.58	2.95	5.63	3.51
																								Chagasic-562	2.91	3.69	3.74	2.45
																								Chagasic-563	3.02	2.83	2.57	2.54
																								Chagasic-564	2.98	2.74	2.94	2.47
																								Chagasic-565	3.08	3.25	1.44	2.26
																								Chagasic-566	3.54	2.8	1.83	2.34
																								Chagasic-567	2.02	3.36	1.64	2.2
																								Chagasic-568	6.06	5.73	4.55	5.15
																								Chagasic-569	2.58	2.59	2.54	2.02
																								Chagasic-570	2.93	1.86	1.71	2.4
																								Chagasic-571	5.03	2.57	3.15	2.86
																								Chagasic-572	2.34	1.54	1.96	2.32
																								Chagasic-573	3.21	1.72	0.99	2.29
																								Chagasic-574	4.25	2.56	2.92	2.42
																								Chagasic-575	2.73	2.23	2.27	2.48
																								Chagasic-576	1.14	1.79	1.92	1.63
																								Chagasic-577	5.7	3.32	2.76	3.08
																								Chagasic-578	1.06	0.49	1.88	1.65
																								Chagasic-579	2.22	2.55	3.17	2.28
																								Chagasic-580	1.9	3.3	2.3	2.11
																								Chagasic-581	5.36	1.9	5.42	5.13
																								Chagasic-582	3.34	1.4	2.62	2.15
																								Chagasic-583	2.78	2.17	2.19	2.36
																								Chagasic-584	2.36	1.64	2.2	2.02
																								Chagasic-585	3.68	2.7	1.82	2.59
																								Chagasic-586	2.52	0.99	2.74	2.33
																								Chagasic-587	3.81	3.21	1.56	2.85
																								Chagasic-588	2.2	1.82	3.55	2.11
																								Chagasic-589	4.49	3.48	2.95	2.79
																								Chagasic-590	1.3	2.39	1.33	1.41
																								Chagasic-591	2.22	1.53	2.84	1.89
																								Chagasic-592	4.21	3.74	3.1	2.56
																								Chagasic-593	1.86	1.62	1.02	1.76
																								Chagasic-594	4.92	3.6	3.07	2.82
																								Chagasic-595	4.81	3.73	4.2	2.74
																								Chagasic-596	2.37	2.1	3.12	2.2
																								Chagasic-597	3.82	2.27	3.88	2.86
																								Chagasic-598	2.08	2.19	3.48	2.13
																								Chagasic-599	2.05	1.76	3.11	2.31
																								Chagasic-600	4.36	3.75	2.59	2.67
																								Chagasic-601	2.54	3.4	3.72	2.43
																								Chagasic-602	2.04	0.97	1.48	1.31
																								Chagasic-603	3.05	1.98	2.56	2.18
																								Chagasic-604	3.02	1.4	5.23	2.01
																								Chagasic-605	3.03	3.88	4.16	2.63
																								Chagasic-606	2.91	5.12	3.02	2.85
																								Chagasic-607	3.66	5.94	1.95	3.13
																								Chagasic-608	4.82	2.56	2.59	2.32
																								Chagasic-609	2.7	1.45	3.85	2.21
																								Chagasic-610	2.42	1.9	3.32	2.21
																								Chagasic-611	2.03	1.25	2.11	1.69
																								Chagasic-612	3.13	1.61	2.56	2.02
																								Chagasic-613	1.56	1.3	1.02	1.12
																								Chagasic-614	1	1	1.08	0.98
																								Chagasic-615	3.6	1.91	2.02	2.79
																								Chagasic-616	4.32	4.44	2.19	3.23
																								Chagasic-617	3.06	3.24	2.88	2.45
																								Chagasic-618	1.82	3.01	3.63	2.26
																								Chagasic-619	3.27	2.19	2.47	2.4
																								Chagasic-620	2.6	1.64	3.87	2.26
																								Chagasic-621	4.5	1.5	2.73	2.41
																								Chagasic-622	3.09	1.36	2.4	2.51
																								Chagasic-623	3.83	2.97	2.5	2.46
																								Chagasic-624	1.64	1.61	3.4	1.91
																								Chagasic-625	1.95	0.88	1.12	1.94
																								Chagasic-626	3.58	3.75	2.85	2.65
																								Chagasic-627	2.39	2.67	2.35	2.54
																								Chagasic-628	4.39	2.83	1.38	3.05
																								Chagasic-629	3.55	3.78	1.82	2.78
																								Chagasic-630	2.54	1.88	0.33	2.93
																								Chagasic-631	2.02	1.34	1.19	1.45
																								Chagasic-632	1.8	3.03	2.12	1.55
																								Chagasic-633	4.06	3.54	2.95	2.58
																								Chagasic-634	3.92	3.15	2.55	2.28
																								Chagasic-635	3.4	1.89	2.16	1.59
																								Chagasic-636	4.02	2.17	1.79	2.7
																								Chagasic-637	4.02	3.16	2.8	2.78
																								Chagasic-638	4.48	2.42	2.58	2.14
																								Chagasic-639	1.32	0.95	1.25	1.03
																								Chagasic-640	1.26	1.59	1.55	1.07
																								Chagasic-641	2.63	2.81	1.68	1.87
																								Chagasic-642	3.83	1.42	1.75	1.99
																								Chagasic-643	3.65	3.62	2.85	3.23
																								Chagasic-644	4.73	1.42	0.98	3.38
																								Chagasic-645	3.13	1.45	1.89	1.81
																								Chagasic-646	2.43	1.54	3.37	2.02
																								Chagasic-647	3.42	1.58	2.68	2.3
																								Chagasic-648	5.62	3.51	1.92	3.3
																								Chagasic-649	1.04	1.43	1.9	2.32
																								Chagasic-650	2.62	2.76	2.93	2.02
																								Chagasic-651	5.06	3.94	3.34	2.39
																								Chagasic-652	3.26	0.92	2.73	1.8
																								Chagasic-653	3.48	2.21	2.77	2.84
																								Chagasic-654	2.44	2.68	2.82	2.48
																								Chagasic-655	3.12	1.33	2.85	2.39
																								Chagasic-656	1.87	1.34	1.55	1.75
																								Chagasic-657	2.44	0.92	1.47	1.86
																								Chagasic-658	2.64	1.96	1.43	2.42
																								Chagasic-659	2.37	1.96	2.21	2.19
																								Chagasic-660	2.27	2.38	2.74	2.34
																								Chagasic-661	1.39	1.53	1.56	1.26
																								Chagasic-662	4.47	1.66	2.49	2.06
																								Chagasic-663	2.28	1.1	2.37	2.18
																								Chagasic-664	2.06	0.9	2.02	1.75
																								Chagasic-665	1.69	2.4	1.98	2.29
																								Chagasic-666	4.16	2.57	3.03	2.42
																								Chagasic-667	4.02	2.37	3.16	2.58
																								Chagasic-668	5.6	2.45	5.94	3.6
																								Chagasic-669	1.33	1.34	0.99	1.55
																								Chagasic-670	5.28	3.34	3.01	3.72
																								Chagasic-671	3.03	2.65	1.47	2.69
																								Chagasic-672	3.78	2.79	2.83	2.79
																								Chagasic-673	3.42	3.19	3.2	2.49
																								Chagasic-674	2.65	1.8	2.34	2.09
																								Chagasic-675	3.45	4.88	3	3.13
																								Chagasic-676	2.03	3.36	1.42	1.75
																								Chagasic-677	1.81	1.22	1.62	2.01
																								Chagasic-678	3.37	2.45	3.12	2.6
																								Chagasic-679	2.69	0.53	2.77	2.27
																								Chagasic-680	3.53	0.87	1.6	3.07
																								Chagasic-681	7.88	5.64	5.7	7.02
																								Chagasic-682	2.7	1.63	2.9	2.32
																								Chagasic-683	4.1	2.37	4.41	3.55
																								Chagasic-684	3.02	1.05	2.74	2.5
																								Chagasic-685	1.83	0.92	1.97	2
																								Chagasic-686	1.63	1.4	2.27	0.99
																								Chagasic-687	3.59	1.43	2.3	1.83
																								Chagasic-688	2.49	1.79	2.2	2.34
																								Chagasic-689	3.79	2.86	1.74	2.57
																								Chagasic-690	2.47	3.85	2.34	2.61
																								Chagasic-691	1.57	0.97	4.92	3.53
																								Chagasic-692	3.49	2.89	9.65	5.1
																								Chagasic-693	6.34	2.09	3.64	4.88
																								Chagasic-694	3.39	1.44	2.33	3.05
																								Chagasic-695	1.61	1.95	1.41	2.11
																								Chagasic-696	2.81	0.97	3.38	1.69
																								Chagasic-697	4.21	6.59	1.37	3.02
																								Chagasic-698	4.03	4.11	2.22	3.03
																								Chagasic-699	3.76	5.2	2.43	2.71
																								Chagasic-700	5.93	6.38	1.77	3.91
																								Chagasic-701	4.56	2.2	5.3	3.3
																								Chagasic-702	5.63	2.19	2.63	3.2
																								Chagasic-703	3.17	3.5	1.76	2.59
																								Chagasic-704	3.03	2.02	1.79	2.86
																								Chagasic-705	4.47	2.64	2.27	3.2
																								Chagasic-706	1.9	0.82	1.49	1.28
																								Chagasic-707	4.95	1.37	2.82	2.35
																								Chagasic-708	2.67	2.86	2.77	2.66
																								Chagasic-709	4.69	3.88	1.75	3.25
																								Chagasic-710	2.65	2.24	1.83	2.46
																								Chagasic-711	3.73	1.68	5.45	2.5
																								Chagasic-712	1.01	0.69	1.69	0.8
																								Chagasic-713	1.12	1.25	1.48	1.77
																								Chagasic-714	1.43	1.47	1.8	2.04
																								Chagasic-715	3.05	1.87	5.75	2.17
																								Chagasic-716	4.9	7.6	2.11	3.61
																								Chagasic-717	1.89	1.63	1.91	2.27
																								Chagasic-718	3.8	2.17	1.94	2.84
																								Chagasic-719	3.48	2.59	3.48	3.03
																								Chagasic-720	1.38	2.33	2.15	2.43
																								Chagasic-721	4.21	1.16	1.99	2.94
																								Chagasic-722	3.34	4.38	2.43	2.78
																								Chagasic-723	2.56	1.22	2.2	2.22
																								Chagasic-724	6.17	5.26	2.09	3.98
																								Chagasic-725	2.23	1.46	1.17	1.69
																								Chagasic-726	2.35	3.56	1.5	1.9
																								Chagasic-727	4.38	7.04	2.14	3.59
																								Chagasic-728	5.78	1.93	2.06	2.05
																								Chagasic-729	4.04	4.36	1.42	3.14
																								Chagasic-730	5.12	1.6	6.41	3.52
																								Chagasic-731	6.03	1.85	2.56	2.78
																								Chagasic-732	2.97	2.79	3.26	2.91
																								Chagasic-733	1.75	0.86	1.71	1.44
																								Chagasic-734	3.91	3.77	0.92	2.57
																								Chagasic-735	6.92	2.41	4.48	3.57
																								Chagasic-736	1.57	1.75	2.76	1.92
																								Chagasic-737	3.3	2.42	1.58	2.66
																								Chagasic-738	3.84	1.87	4.9	3
																								Chagasic-739	1.66	1.46	1.79	1.47
																								Chagasic-740	6.8	3.3	6.03	3.69
																								Chagasic-741	1.96	1.83	1.75	2.04
																								Chagasic-742	6.06	3.29	6	3.76
																								Chagasic-743	1.11	1.35	2.47	1.7
																								Chagasic-744	2	1.43	2.42	1.99
																								Chagasic-745	3.44	1.22	1.14	2.58
																								Chagasic-746	1.34	1.61	1.83	1.66
																								Chagasic-747	2.03	1.28	1.57	1.35
																								Chagasic-748	3.7	2.47	2.07	2.87
																								Chagasic-749	5.07	2.86	2.86	2.88
																								Chagasic-750	3.7	2.88	3.2	2.92
																								Chagasic-751	3.78	2.86	1.91	2.93
																								Chagasic-752	3.17	6.43	1.67	2.86
																								Chagasic-753	6.56	2.43	5.2	3.58
																								Chagasic-754	4.01	1.79	5.37	2.46
																								Chagasic-755	3.53	2.74	1.64	2.68
																								Chagasic-756	4.58	2.84	2.8	2.79
																								Chagasic-757	4.32	5.11	2.51	3.12
																								Chagasic-758	6.58	3.16	5.95	4.23
																								Chagasic-759	2.92	1.88	2.99	2.27
																								Chagasic-760	3.96	4.72	2.1	3.16
																								Chagasic-761	5.73	2.26	2.58	3.1
																								Chagasic-762	2.7	1.47	3.24	2.2
																								Chagasic-763	2.91	2.51	2.21	2.55
																								Chagasic-764	6.01	2.41	2.92	3.27
																								Chagasic-765	2.18	2.18	1.86	1.98
																								Chagasic-766	2.57	1.39	1.9	2
																								Chagasic-767	4.83	1.89	2.76	3.08
																								Chagasic-768	1.56	1.08	1.58	1.98
																								Chagasic-769	1.65	3.01	2.56	1.82
																								Chagasic-770	2.33	2.82	1.86	2.15
																								Chagasic-771	1.59	1.26	1.39	1.94
																								Chagasic-772	0.92	0.94	1.99	1.56
																								Chagasic-773	1.65	1.72	1.88	2.06
																								Chagasic-774	3.52	2.3	5.95	3.1
																								Chagasic-775	1.48	1.65	1.18	1.37
																								Chagasic-776	4.45	5.41	2.7	3.32
																								Chagasic-777	3.41	2.06	3.34	2.52
																								Chagasic-778	1.99	1.85	1.82	1.63
																								Chagasic-779	2.38	4.59	2.57	2.6
																								Chagasic-780	3.26	1.14	3.19	1.82
																								Chagasic-781	4.09	2.52	2.85	2.79
																								Chagasic-782	3.18	4.41	2.93	2.9
																								Chagasic-783	3.01	2.35	2.49	3.12
																								Chagasic-784	3.24	2.03	1.74	1.58
																								Chagasic-785	3.19	4.74	2.88	2.82
																								Chagasic-786	4.94	6.02	1.83	2.99
																								Chagasic-787	2.99	1.47	5.11	2.67
																								Chagasic-788	2.72	5.16	2.9	2.79
																								Chagasic-789	1.16	2.77	2.13	1.28
																								Chagasic-790	1.43	1.14	2.32	1.67
																								Chagasic-791	4.61	1.41	1.49	2.35
																								Chagasic-792	2.93	1.88	2.55	1.73
																								Chagasic-793	2.03	2.59	3.66	2.25
																								Chagasic-794	3.81	1.52	2.21	2.31
																								Chagasic-795	3.82	3.96	2.62	3.26
																								Chagasic-796	4.59	3.83	1.58	3.16
																								Chagasic-797	0.96	1.31	2.53	1.49
																								Chagasic-798	2.54	1.14	2.13	1.81
																								Chagasic-799	1.27	3.01	3.46	1.9
																								Chagasic-800	2.13	3.38	3.81	2.39
																								Chagasic-801	1.41	2.28	2.29	1.71
																								Chagasic-802	2.93	2.32	2.31	2.34
																								Chagasic-803	3.1	5.12	3.21	2.7
																								Chagasic-804	2.27	1.2	2.15	1.75
																								Chagasic-805	4.44	1.32	1.63	2
																								Chagasic-806	1.64	2.2	2.04	2.1
																								Chagasic-807	2.14	1.18	1.91	1.98
																								Chagasic-808	1.95	1.14	1.54	1.8
																								Chagasic-809	2	1.83	2.41	1.7
																								Chagasic-810	4.68	2.33	2.07	2.2
																								Chagasic-811	2.34	2.1	2.54	2.07
																								Chagasic-812	2.81	3.14	2.82	2.44
																								Chagasic-813	5.3	2.14	2.28	3.04
																								Chagasic-814	2.06	1.36	3.06	1.88
																								Chagasic-815	3.48	5.8	3.19	3.27
																								Chagasic-816	1.89	1.35	0.91	1.73
																								Chagasic-817	2.01	2.54	2.08	1.67
																								Chagasic-818	2.15	2.27	2.52	2.05
																								Chagasic-819	1.82	1.25	1.8	1.91
																								Chagasic-820	2.81	3.16	4.07	2.58
																								Chagasic-821	5.36	1.85	2.78	3.18
																								Chagasic-822	4.56	1.46	1.78	2.04
																								Chagasic-823	3.02	4.41	2.54	2.97
																								Chagasic-824	3.64	1.84	3.04	2.44
																								Chagasic-825	1.8	1.83	1.88	1.11
																								Chagasic-826	2.43	1.43	2.43	1.94
																								Chagasic-827	5.2	6.16	1.52	3.03
																								Chagasic-828	2.05	2.18	1.6	2.47
																								Chagasic-829	1.05	1.15	3.07	1.59
																								Chagasic-830	4.99	2.58	3.07	2.83
																								Chagasic-831	4.68	5.12	2.16	3.49
																								Chagasic-832	1.79	1.2	1.27	2.07
																								Chagasic-833	3.67	3.49	4.17	2.67
																								Chagasic-834	2.75	2.13	1.92	2.64
																								Chagasic-835	1.62	1.1	1.5	1.36
																								Chagasic-836	2.07	1.5	1.08	1.83
																								Chagasic-837	4.45	4.7	2.61	3.07
																								Chagasic-838	1.29	1.9	2.46	1.26
																								Chagasic-839	4.74	2.29	2.71	3.4
																								Chagasic-840	3.88	6.06	2.25	3.04
																								Chagasic-841	3.62	1.97	1.97	2.02
																								Chagasic-842	2.07	2.93	3.11	2.11
																								Chagasic-843	4.68	1.22	2.94	2.92
																								Chagasic-844	4.89	1.54	2.61	2.72
																								Chagasic-845	2.03	1.69	1.17	1.55
																								Chagasic-846	4.25	1.48	2.12	2.56
																								Chagasic-847	1.85	1.46	1.44	1.6
																								Chagasic-848	3.09	1.28	1.18	1.68
																								Chagasic-849	4.09	4.02	2.09	2.41
																								Chagasic-850	2.02	1.79	3.58	1.9
																								Chagasic-851	7.24	2.43	2.44	3.42
																								Chagasic-852	5.57	1.79	4.22	4.01
																								Chagasic-853	2.71	3.13	4.08	2.54
																								Chagasic-854	3.31	2.52	4.07	3.16
																								Chagasic-855	3.67	3.07	3.99	2.79
																								Chagasic-856	3.17	2.36	2.18	2.62
																								Chagasic-857	4.73	4.86	4.7	4.16
